# Supplementary material for: Discovery of cis-elements between sorghum and rice using co-expression and evolutionary conservation
Source: PubMed Central journal article supplement (PMC2714861; doi:10.1186/1471-2164-10-284), 2009-06-26

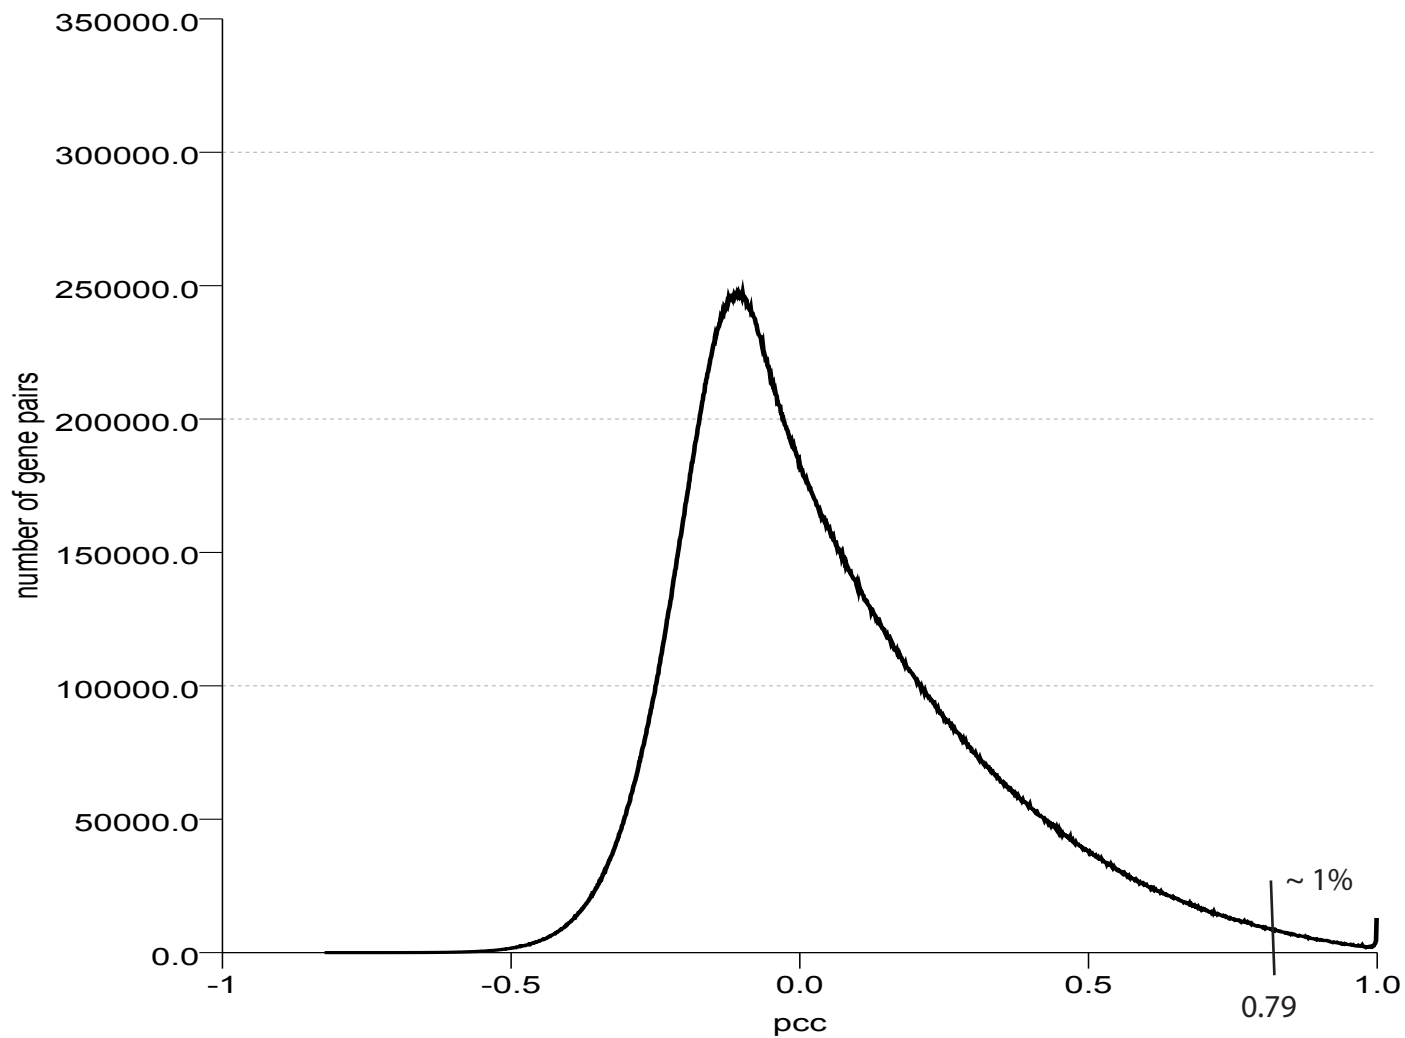

Supplement: 1471-2164-10-284-S10.pdf [file 1471-2164-10-284-S10.pdf]
